# Supplementary material
Source: MDPI journal article supplement (https://www.mdpi.com/2673-8236/3/4/28)
Supplement: s1 [file s1]

**Table S1. Studies of bone and/or cardiovascular remodeling in rodent models of CKD-MBD**

| Reference                     | Model<br>(relevant CKD stage)               | Experimental<br>exposure                                      | Phosphate,<br>PTH,<br>FGF23 | Bone turnover                                                                          | Cardiac and<br>vascular<br>remodeling    |
|-------------------------------|---------------------------------------------|---------------------------------------------------------------|-----------------------------|----------------------------------------------------------------------------------------|------------------------------------------|
| Iwasaki-Ishizuka et al., 2005 | 1/2 Nx (S2)<br>3/4 Nx (S3)<br>5/6 Nx (S3-4) | Nx, TPTx, PTH infusion                                        | Pi↔<br>PTH↔                 | Low (low bone formation rate (BFR), osteoclast (Oc) parameters)                        | NA                                       |
| Mathew et al., 2007           | LDLR-/-<br>(S3)                             | Electrocoagulation, high fat diet                             | Pi↑<br>PTH↑                 | Low (low BFR, osteoblast (Ob) number)                                                  | NA                                       |
| Moe et al., 2009              | Cy/+<br>(S3-4)                              | Phosphate 0,2 or 0,7%                                         | Pi↑<br>PTH↑<br>FGF23↑       | High (in 0.7% Pi) (high Ob and Oc parameters, fibrosis)                                | NA                                       |
| Nikolov et al., 2010          | ApoE-/-<br>(S3-4)                           | Genetic model                                                 | Pi↔<br>PTH↔                 | Higher bone mass, trabecular bone (TB) volume                                          | NA                                       |
| Sabbagh et al., 2012          | Jck<br>(S2-5)                               | Genetic model                                                 | Pi↑<br>PTH↑<br>FGF23↑       | High (high BFR, TB, Ob number, mineralization)                                         | NA                                       |
| Stubbs et al., 2012           | Col4a3+/+FGF23+/eGFP<br>(S3)                | Genetic model                                                 | Pi↑<br>PTH↑<br>FGF23↑       | High (higher resorption parameters)                                                    | NA                                       |
| Ferreira et al., 2013         | 5/6 Nx<br>(S3-4)                            | TPTx and PTH infusion, phosphate 0,6 or 1,2%                  | Pi↑<br>PTH↓<br>FGF23↓       | Low (low BFR, bone volume (BV), Ob and osteocyte (Ot) parameters, Ob and Oc apoptosis) | NA                                       |
| Fang et al., 2014             | LDLR-/-<br>(S2-3)                           | Nx, high fat diet                                             | Pi↑<br>PTH↔<br>FGF23↑       | Low (low BFR, TB volume, TH thickness)                                                 | NA                                       |
| Fang et al., 2014             | LDLR-/-<br>(S2-3)                           | Nx, high fat diet                                             | Pi↑<br>PTH↔<br>FGF23↑       | Low (low BFR, osteoid volume, Ob and Oc number)                                        | NA                                       |
| Frauscher et al., 2017        | DBA/2<br>(S3-4)                             | High phosphate diet                                           | Pi↑<br>PTH↑<br>FGF23↔       | Low                                                                                    | NA                                       |
| Liao et al., 2019             | 5/6 Nx<br>(S3)                              | Nx                                                            | Pi↑<br>PTH↔<br>FGF23↑       | High (high BFR, mineralization)                                                        | NA                                       |
| Hsu et al., 2022              | 0.2% adenine<br>C57BL/6<br>(S3)             | Adenine                                                       | Pi↑<br>PTH↑<br>FGF23↑       | Low (low TB volume and thickness)                                                      | NA                                       |
| Mathew et al., 2007           | LDLR-/-<br>(S3)                             | High-cholesterol (0.15%) diet, electrocoagulation and left Nx | Pi↔                         | Low (low BFR, BV, osteoid volume, Ob surface)<br>10.1681/ASN.2006050490                | Vascular Ca concentration ↑              |
| Santhanam et al., 2021        | C57BL/6J<br>(S?)                            | Aged mice or western HFD (21.2% fat)                          | NA                          | Low (low BV)<br>10.1172/JCI147116                                                      | Aortic wall remodeling and calcification |

|                             |                     |                                                  |                       |                                                                                                     |                                           |
|-----------------------------|---------------------|--------------------------------------------------|-----------------------|-----------------------------------------------------------------------------------------------------|-------------------------------------------|
| <b>Mace et al.<br/>2021</b> | Dark agouti<br>(S?) | Transplanted aorta<br>from 5/6 Nx rats<br>(S3–4) | Pi↑<br>PTH↔<br>FGF23↔ | Low (osteoid volume,<br>tendency for lowering other<br>bone formation indexes)<br>10.1002/jbmr.4203 | Increase in<br>Wnt inhibitors<br>in aorta |
|-----------------------------|---------------------|--------------------------------------------------|-----------------------|-----------------------------------------------------------------------------------------------------|-------------------------------------------|

NA- not applicable; ↑ - increase, ↓ - decrease; ↔ - no differences

**Table S2. Primer and probe sequences for RT-PCR**

| Gene                                       | Primer sequence (5'→3')     | Probe R-sequence-Q (5'→3')            |
|--------------------------------------------|-----------------------------|---------------------------------------|
| Phosphate and pyrophosphate transporters   |                             |                                       |
| Slc20a1                                    | F: CTCATCCTGGGCTTCATCAT     | FAM-CATTTGTCTTGGCATTCTCCGTGGG-BHQ1    |
|                                            | R: CCGGATGGTTTCACTCACTT     |                                       |
| Slc20a2                                    | F: GCTCTACCATTTGGCTTCTCG    | R6G-ATCGTTGCCTCCTGGTTCATATCCC-BHQ1    |
|                                            | R: ACAGAGGAAGTGCCTGGAGA     |                                       |
| Xpr1                                       | F: AAGACGTGATTCTGCGCTTT     | ROX-TGCTACAACTTTTAAGCCTCATGTTGGG-BHQ2 |
|                                            | R: CACGGAATTCACCACAGTTG     |                                       |
| Ankh                                       | F: CAAGAGAGACAGGGCCAAAG     | FAM-CAGTCTTCCACACCCTGATAGCCTBHQ1      |
|                                            | R: AAGGCAGCGAGATACAGGAA     |                                       |
| MAPK signaling                             |                             |                                       |
| Mapk3                                      | F: TCCAAGGGCTACACCAAATC     | FAM-CTACCTGGACCAGCTCAACCACA-BHQ1      |
|                                            | R: AGGTAGTTTCGGGCCTTCAT     |                                       |
| Mapk1                                      | F: TTGCTGAAGCACCATTCAAG     | R6G-CAGGACAAGGGCTCAGAGGACTG-BHQ1      |
|                                            | R: ACGGCTCAAAGGAGTCAAGA     |                                       |
| Klotho/FGF23 regulatory axis               |                             |                                       |
| Kl                                         | F: AGCTGCTTGTGTTGTGATGC     | FAM-ATGGTGGCGGTTTTAAACAGGCA-BHQ1      |
|                                            | R: TACGGGGGTGCTGTAGAAAC     |                                       |
| Fgfr2                                      | F: ACTGGACCAACACCGAAAAG     | FAM-ACGAAACCAGCACTGGAGCCTTATT-BHQ1    |
|                                            | R: CTCCACCAGGCAGGTGTAAT     |                                       |
| Fgf23                                      | F: TGGGCACTGCTAGAGCCTAT     | ROX-CAAGGTGTACAGTGACCCCCAGC-BHQ2      |
|                                            | R: GCGGAGATCCATACAAAGGA     |                                       |
| Canonical Wnt signaling and its inhibitors |                             |                                       |
| Ctnnb1                                     | F: GCCAGTGGATTCCGTACTGT     | Cy5-CACCACGCTGCATAATCTCCTGCT-BHQ2     |
|                                            | R: GAGCTTGCTTTCCTGATTGC     |                                       |
| Wnt10b                                     | F: GCACTGTCTAGGGGCAAGAG     | Cy5-CCAGCCCTATTCTGGCTCTGTC-BHQ2       |
|                                            | R: CACTTCCGCTTCAGGTTTTT     |                                       |
| Fzd2                                       | F: GAACTCCTGCGCTACTCACC     | ROX-CCTCAAGGTGCCGTCCTATCTCA-BHQ2      |
|                                            | R: TCCTCCTGCGAGAAGAACAT     |                                       |
| Dkk1                                       | F: TTA CTGTGGGGAAGGTCTGG    | Cy5-CCAACAGCCTAAATGCGATGGACTC-BHQ2    |
|                                            | R: ACATCCTTGGGATTGAGCTG     |                                       |
| Sost                                       | F: CAGCTCTCACTAGCCCCTTG     | ROX-CTGCTTGTACATGCAGCCTTCGT-BHQ2      |
|                                            | R: CGGTTTCATGGTCTGTTGTT     |                                       |
| Sfrp2                                      | F: TGTCCGATAGGGACCTGAAG     | R6G-TGGGACAGAAACAGGGTGGAGAG-BHQ1      |
|                                            | R: CGAGAAGCCACTCCACTAGG     |                                       |
| VDR/OPG/RANKL regulatory axis              |                             |                                       |
| Vdr                                        | F: AACTCCTCCTCCTCCAGCTC     | ROX-CCTGTCTCCTCTCTCCATGCTGCBHQ2       |
|                                            | R: CTGGTCATCGGAGGTGAGAT     |                                       |
| Cyp27b1                                    | F: GGTGAGAGGCTTGGCTAGTG     | Cy5-ATGGGGACAGTTGAAACTGCACCTT-BHQ2    |
|                                            | R: TCTGGAGTTCAGGAGCCAGT     |                                       |
| Tnfrsf11B                                  | F: GAATGGTCACTGGGCTGTTT     | Cy5-TGGGAATGAAGATCCTCCAGCCC-BHQ2      |
|                                            | R: CCTCTTTCTCAGGGTGCTTG     |                                       |
| Tnfrsf11                                   | F: CATCGGGTTC CCATAAAGTCAGT | FAM-TCAGGCATCATGAAACCTCAGGGAG-BHQ1    |
|                                            | R: GAACTTGGGATTTTGATGCTGGT  |                                       |
| Lgr4                                       | F: GGGAAGAGCAGTCACCTCAG     | R6G-CCCTCTTAGCTTTGCTGGGTGC-BHQ1       |
|                                            | R: TAACGATGGGGTTTCTCCTG     |                                       |

| Osteogenesis genes    |                          |                                     |
|-----------------------|--------------------------|-------------------------------------|
| Sp7                   | F: CACTGGCTCCTGGTTCTCTC  | R6G-AGCTCACTATGGCTCCAGTCCC-BHQ1     |
|                       | R: GGGGCTGAAAGGTCAGTGTA  |                                     |
| Bmp4                  | F: TAGGAGCCATTCCGTAGTGC  | ROX- TCTCTGAGCCTTTCAGCAAGTTGT-BHQ2  |
|                       | R: CTTCCCGGTCTCAGGTATCA  |                                     |
| Bmp2                  | F: AGAGCTTTGATGTCACCCCG  | Cy5-CAGCACAGGGACACACCAACCAT-BHQ2    |
|                       | R: AAGGACATTCCCCATGGCAG  |                                     |
| Dmp1                  | F: CGGCTGGTGGTCTCTCTAAG  | R6G-CAGTCCAGTGAAGACAGCACGTCT-BHQ1   |
|                       | R: CATCACTGTGGTGGTCCTTG  |                                     |
| Notch signaling       |                          |                                     |
| Notch1                | F: TGAGTGTGTGAAAAGCCCGT  | FAM-CGCCAGCAATCCATGCCAAAATG-BHQ1    |
|                       | R: ACAGGAGCTCTCGGTACAGT  |                                     |
| Jag1                  | F: GCGCACTGTGAGAACAACA   | FAM-CTAGAAACAGTAGCTGCCTGCCGA-BHQ1   |
|                       | R: AGTCTCCATTGACCACGCAG  |                                     |
| Hes1                  | F: GGCTCCTGACGGCCAATTT   | R6G-CGGTCTACACCAGCAACAGCG-BHQ1      |
|                       | R: AAGGCGACACTGCGTTAGG   |                                     |
| Numb                  | F: TAGTGCTACCACCAGTCCCT  | R6G-CAATGGTGTAGACAATAGCGGGCTAG-BHQ1 |
|                       | R: GTGCAGGTCTGTTTCCTGAGA |                                     |
| Hedgehog signaling    |                          |                                     |
| Ptch1                 | F: CAGTACATCAGCCTGCGTCA  | FAM-CATTGGGATCAAGCTGAGTGCTGTG-BHQ1  |
|                       | R: CCTGTGGTTCTTGTCCCCAA  |                                     |
| Calcineurin signaling |                          |                                     |
| Ppp3ca                | F: ACGCCTGTATGGATGCCTTC  | Cy5-CAACACAGTCAGGGGTTGTTCTGTAC-BHQ2 |
|                       | R: GCAGCGACCAGGTGAAAAC   |                                     |
| Tgfβ-signaling        |                          |                                     |
| Tgfβ1                 | F: CGTCAGACATTCCGGGAAGCA | ROX-CAGTGGCTGAACCAAGGAGACG-BHQ2     |
|                       | R: TCGACGTTTGGGACTGATCC  |                                     |
| Reference gene        |                          |                                     |
| Gapdh                 | F: AGACAGCCGCATCTTCTTGT  | R6G-TGCCAGCCTCGTCTCATAGACAAG-BHQ1   |
|                       | R: CTTGCCGTGGGTAGAGTCAT  |                                     |

*Slc20a1* – solute carrier family 20 member 1 (Pit-1), *Slc20a2* – solute carrier family 20 member 2 (Pit2), *Xpr1* – xenotropic and polytropic retrovirus receptor 1, *Ankh* – ANKH PPI transport regulator, *Mapk3* – mitogen activated protein kinase 3 (Erk1), *Mapk1* – mitogen activated protein kinase 1 (Erk2), *KL* – Klotho, *Fgf23* – fibroblast growth factor 23, *Fgfr2* – fibroblast growth factor receptor 2, *Ctnnb1* – catenin beta 1, *Sfrp2* – secreted frizzled-related protein 2, *Fzd2* – frizzled class receptor 2, *Wnt10b* – Wnt family member 10B, *Sost* – sclerostin, *Dkk1* – dickkopf 1, *Vdr* – vitamin D receptor, *Cyp27b1* – cytochrome P450, family 27, subfamily b, polypeptide 1 (1-alpha-(OH)ase), *Tnfrsf11B* – TNF receptor superfamily member 11 B (OPG), *Tnfrsf11* – TNF superfamily member 11 (RANKL), *Lgr4* – leucine-rich repeat-containing G protein-coupled receptor 4, *Sp7* – Sp7 transcription factor (osterix), *Bmp4* – bone morphogenetic protein 4, *Dmp1* – dentin matrix acidic phosphoprotein 1, *Gapdh* – glyceraldehyde-3-phosphate dehydrogenase;

*Notch1* – notch receptor 1, *Jag1* – jagged canonical Notch ligand 1, *Hes1* – hes family bHLH transcription factor 1, *Numb* – NUMB endocytic adaptor protein, *Ptch1* – patched 1, *Ppp3ca* – calcineurin A, *Tgf-beta 1* – transforming growth factor beta 1.

**Table S3. Description of experimental groups**

| Group                                     | WKY2 (1)                        | SO2 (2)                          | SO6 (3)                         | Nx2 (4)                     | Nx6 (5)                     |
|-------------------------------------------|---------------------------------|----------------------------------|---------------------------------|-----------------------------|-----------------------------|
| Strain                                    | Wistar Kyoto rats               |                                  | Spontaneously hypertensive rats |                             |                             |
| Model                                     | normotensive control            | control                          | mild CKD models                 |                             |                             |
| Surgery                                   |                                 | sham                             | 3/4 nephrectomy                 |                             |                             |
| Duration of the experiment, mo            | 2                               | 2                                | 6                               | 2                           | 6                           |
| Rats number, n                            | 8                               | 8                                | 8                               | 8                           | 8                           |
| Initial body weight, g                    | 228 (224;230)                   | 220 (215;226)                    | 215 (207;228)                   | 224 (217;228)               | 222 (212;229)               |
| Final body weight, g                      | 345 (336;361)                   | 317 (311;337)                    | 317 (306;336)                   | 320 (300;370)               | 331 (309;365)               |
| Systolic blood pressure, mmHg             | 135 (130;142) <sup>2-5#</sup>   | 170 (160;182) <sup>3,4*5#</sup>  | 195 (183;200)                   | 195 (180;205)               | 208 (195;223)               |
| Myocardial mass index, mg/g               | 2.5 (2.1;2.8) <sup>3,4*5‡</sup> | 2.8 (2.8;3.1) <sup>5*</sup>      | 3.0 (2.9;3.4)                   | 3.3 (2.8;3.5)               | 3.4 (3.2;3.6)               |
| Myocardial wall thickness, mm             | 2.1 (2.0;2.2) <sup>3‡4*5#</sup> | 2.3 (2.2;2.5) <sup>5‡</sup>      | 2.5 (2.4;2.7) <sup>5*</sup>     | 2.4 (2.2;2.5) <sup>5‡</sup> | 2.9 (2.8;2.9)               |
| IA diameter, mcm                          | 99 (77-108) <sup>3,5#</sup>     | 90 (82-94) <sup>3,5‡</sup>       | 126 (111-145)                   | 80 (69-98)                  | 176 (148-214)               |
| Left kidney mass, g                       | 1.2 (1.1;1.2) <sup>3-5‡</sup>   | 1.1 (1.1;1.2) <sup>4*5‡</sup>    | 1.2 (1.1;1.3) <sup>5‡</sup>     | 1.3 (1.2;1.4) <sup>5‡</sup> | 2.0 (1.8;2.0)               |
| Kidney phosphorus, mg/kg                  | 818 (770;877)                   | 872 (606;1241)                   | 822 (637;1024)                  | 699 (668;825)               | 734 (671;862)               |
| Bone phosphorus, g/kg                     | 59 (33;63)                      | 63 (58;64)                       | 63 (61;64)                      | 63 (55;65)                  | 60 (59;64)                  |
| Myocardial phosphorus, mg/kg              | 506 (374;839)                   | 629 (593;726) <sup>4*</sup>      | 578 (546;607) <sup>5*</sup>     | 859 (683;920)               | 675 (588;837)               |
| Estimated serum phosphorus per rat, mg    | 0.9 (0.8;1.0) <sup>5#</sup>     | 1.1 (1.0;1.2) <sup>5‡</sup>      | 1.1 (1.0;1.2) <sup>5#</sup>     | 1.0 (1.0;1.0) <sup>5#</sup> | 1.4 (1.3;1.5) <sup>5#</sup> |
| Serum inorganic phosphate, mmol/L         | 1.5 (1.2;1.60) <sup>3-5#</sup>  | 1.9 (1.7;1.9) <sup>5*</sup>      | 1.9 (1.8;2.0) <sup>5‡</sup>     | 1.6 (1.5;1.8) <sup>5*</sup> | 2.2 (2.1;2.3)               |
| Fractional phosphate excretion, %         | 29 (23;33) <sup>4,5‡</sup>      | 32 (27;42) <sup>4,5‡</sup>       | 38 (32;44) <sup>4,5‡</sup>      | 63 (47;65)                  | 56 (45;59)                  |
| Urinary phosphate/creatinine, mg/mg       | 5.6 (4.5;6.5) <sup>2-5*</sup>   | 8.9 (6.9;10.1)                   | 8.6 (7.9;9.8)                   | 10.1 (7.6;12.7)             | 9.3 (8.9;11.2)              |
| Intact parathyroid hormone, pg/mL         | 55.1(12.7;112.9)                | 76.6 (18.4;111.0)                | 45.5 (12.6;67.1)                | 45.9 (21.2;76.6)            | 33.5 (9.6;84.9)             |
| Intact fibroblast growth factor 23, pg/mL | 351 (290;836)                   | 361 (330;1530)                   | 468 (326;694)                   | 676 (330;793)               | 630 (330;953)               |
| Serum Klotho, pg/mL                       | 2698 (2413;2831)                | 2916 (2520;5374) <sup>3-5*</sup> | 2043 (1676;2663)                | 2304 (2074;2524)            | 2259 (1428;2696)            |

Superscripts correspond to *p*-values of inter-group differences (each group is indicated by a group number); \* *p* < 0.05, ‡ *p* < 0.005, # *p* < 0.001.
